# Supplementary material
Source: publisher figshare collection journal article supplement (https://sage.figshare.com/ndownloader/files/23612629)
Supplement: Supplementary file 1 [file 23612629]

Appendix 1. Questionnaire applied to higher education students.

|                                                                                                                                                                                                                                                                                                                                                                                                                                                                                                                                                                                                                                                                                                                                                                             |
|-----------------------------------------------------------------------------------------------------------------------------------------------------------------------------------------------------------------------------------------------------------------------------------------------------------------------------------------------------------------------------------------------------------------------------------------------------------------------------------------------------------------------------------------------------------------------------------------------------------------------------------------------------------------------------------------------------------------------------------------------------------------------------|
| Q1. How old are you?                                                                                                                                                                                                                                                                                                                                                                                                                                                                                                                                                                                                                                                                                                                                                        |
| Q2. Gender / Sex? <input type="checkbox"/> Male <input type="checkbox"/> Female                                                                                                                                                                                                                                                                                                                                                                                                                                                                                                                                                                                                                                                                                             |
| Q3. Did you have symptoms of COVID-19?                                                                                                                                                                                                                                                                                                                                                                                                                                                                                                                                                                                                                                                                                                                                      |
| Q4. Are you at risk group for COVID-19?                                                                                                                                                                                                                                                                                                                                                                                                                                                                                                                                                                                                                                                                                                                                     |
| Q5. How do you feel about the coronavirus pandemic?<br><input type="checkbox"/> panic <input type="checkbox"/> fear <input type="checkbox"/> anxious <input type="checkbox"/> calm <input type="checkbox"/> indifferent                                                                                                                                                                                                                                                                                                                                                                                                                                                                                                                                                     |
| Q6. What is your level of anxiety/stress related to the coronavirus pandemic?<br>(0 indicates no anxiety/stress and 10 indicates extremely anxious/stressed)<br><input type="checkbox"/> 0 <input type="checkbox"/> 1 <input type="checkbox"/> 2 <input type="checkbox"/> 3 <input type="checkbox"/> 4 <input type="checkbox"/> 5 <input type="checkbox"/> 6 <input type="checkbox"/> 7 <input type="checkbox"/> 8 <input type="checkbox"/> 9 <input type="checkbox"/> 10                                                                                                                                                                                                                                                                                                   |
| Q7. How are you respecting the quarantine?<br><input type="checkbox"/> I am not leaving home<br><input type="checkbox"/> I leave home only when necessary (market, pharmacy)<br><input type="checkbox"/> I am not respecting the quarantine                                                                                                                                                                                                                                                                                                                                                                                                                                                                                                                                 |
| Q8. Distance learning was an option to continue education during the quarantine. Do you agree with the distance learning during this period?<br><input type="checkbox"/> Yes <input type="checkbox"/> No <input type="checkbox"/> Partially                                                                                                                                                                                                                                                                                                                                                                                                                                                                                                                                 |
| Q9. Are you enjoying distance learning? <input type="checkbox"/> Yes <input type="checkbox"/> No <input type="checkbox"/> Partially                                                                                                                                                                                                                                                                                                                                                                                                                                                                                                                                                                                                                                         |
| Q10. Regarding distance learning:<br><input type="checkbox"/> I am following and learning well, without difficulty<br><input type="checkbox"/> I am having some difficulty in learning what is being taught<br><input type="checkbox"/> I am having a lot of difficulty and my learning is impaired<br><input type="checkbox"/> I am not following distance learning activities                                                                                                                                                                                                                                                                                                                                                                                             |
| Q11. What are your concerns about how quarantine can affect your higher education course?<br>- It will reduce my clinical practice <input type="checkbox"/> Yes <input type="checkbox"/> No <input type="checkbox"/> Partially<br>- It will reduce the theoretical learning <input type="checkbox"/> Yes <input type="checkbox"/> No <input type="checkbox"/> Partially<br>- It will reduce the practical learning <input type="checkbox"/> Yes <input type="checkbox"/> No <input type="checkbox"/> Partially<br>- I am afraid with the exams <input type="checkbox"/> Yes <input type="checkbox"/> No <input type="checkbox"/> Partially<br>- I am afraid of failing the year <input type="checkbox"/> Yes <input type="checkbox"/> No <input type="checkbox"/> Partially |
| Q12. Regarding the distance activities requested by faculty to students, what is your opinion?<br>- Are they consistent with the content taught? <input type="checkbox"/> Yes <input type="checkbox"/> No <input type="checkbox"/> Partially<br>- Help to consolidate and improve learning? <input type="checkbox"/> Yes <input type="checkbox"/> No <input type="checkbox"/> Partially<br>- Is the frequency sufficient? <input type="checkbox"/> Yes <input type="checkbox"/> No <input type="checkbox"/> Partially                                                                                                                                                                                                                                                       |
| Q13. What is the greatest difficulty found in distance learning?<br><input type="checkbox"/> To find time to access the material<br><input type="checkbox"/> Learning without the presence of the faculty<br><input type="checkbox"/> Establish a study routine<br><input type="checkbox"/> Consolidate learning                                                                                                                                                                                                                                                                                                                                                                                                                                                            |
| Q14. What is your level of concern related to the impact of the quarantine in your higher education course and learning? (0 indicates no concern and 10 indicates extremely concerned)<br><input type="checkbox"/> 0 <input type="checkbox"/> 1 <input type="checkbox"/> 2 <input type="checkbox"/> 3 <input type="checkbox"/> 4 <input type="checkbox"/> 5 <input type="checkbox"/> 6 <input type="checkbox"/> 7 <input type="checkbox"/> 8 <input type="checkbox"/> 9 <input type="checkbox"/> 10                                                                                                                                                                                                                                                                         |
| Q15. Would you like some distance online activities to be maintained after the quarantine has ended?<br><input type="checkbox"/> Yes <input type="checkbox"/> No <input type="checkbox"/> I am not sure                                                                                                                                                                                                                                                                                                                                                                                                                                                                                                                                                                     |
